# Supplementary material
Source: Research Square preprint supplement (doi:10.21203/rs.3.rs-9131981/v1)
Supplement: Supplementary file 1 [file e0c4dad22c4635b730300ff7.docx]

**Supporting Information**

**An efficient** **room-****temperature H2** **production** **system containing** **hypophosphite** **and CuPd/TiO2 catalyst**

**Characterization**

X-ray diffraction (XRD) patterns were measured using the XRD6100 polycrystalline X-ray diffractometer (Shimadzu, Japan) with Cu Kα radiation as the X-ray source. Scanning electron microscopy (SEM) images were obtained from an SU8020 (HITACHI, Japan) with a working voltage of 30 kV. Transmission electron microscopy (TEM) and high-resolution TEM (HR-TEM) images were obtained from a Titan G260-300 microscope operating at 300 kV. X-ray photoelectron spectroscopy (XPS) analyses were obtained on the ESCALAB250xi photoelectron spectrometer (Thermo Scientific) using monochromatized Mg Kα X-Ray resource (150 W) with C 1s = 284.8 eV as an internal reference. N2 gas adsorption/desorption isotherms were measured on the ASAP 2460 nitrogen adsorption apparatus (Micromeritics Instruments, USA). The actual amounts of Pd and Cu in the catalysts were measured by inductively coupled plasma optical emission spectrometry (ICP-OES, Agilent 730, USA). CO-infrared Fourier transform spectroscopy (CO-IR) measurements were performed on a Bruker Tensor 27 instrument with a Hg-Cd-Te (MCT) detector. The catalysts were pretreated with 100 mL/min of 10% H2/Ar at 300°C for 30 min. The CO adsorption was performed at room temperature. 10% CO/Ar was introduced into the cell at a flow rate of 100 mL/min. After the CO saturation, Ar purge at a flow rate of 100 mL/min was performed to remove gas phase CO from the cell. The electron spin resonances (ESR) spectrum was tested by a Bruker A300 instrument, the PBN(N-tert-Butyl-*α*-phenylnitrone) was employed as the trapping agent to detect the HPO2− radicals generated in the hydrogen production system. Fourier transform infrared (FTIR) spectra were recorded in transmission mode from 400 to 4000 cm−1 at a resolution of 8 cm−1 on a Nicolet Magna 560 IR spectrometer using the KBr pellet technique.

**Computational method**

All the DFT calculations were conducted based on the Vienna Ab initio Simulation Package (VASP). The exchange-correlation potential was described by the Perdew−Burke−Ernzerhof (PBE) generalized gradient approach (GGA). The electron-ion interactions were accounted by the projector augmented wave (PAW). All DFT calculations were performed with a cut-off energy of 450 eV, and the 2×2×1 Gamma centered Monkhorst-Pack grids k-points were selected to sample the Brillouin zone integration. The energy and force convergence criteria of the self-consistent iteration were set to 10-5 eV and 0.08 eV Å-1, respectively. DFT-D3 method was used to describe van der Waals (vdW) interactions. Adsorption energy (*E*ads) was calculated by using the following definitions:

*E*ads = *E*total - Eslab -Eadsorbate (3)

Where the *E*total is the total electronic energy for the adsorbate and slab; *E*slab is the electronic energy of slab, Eadsobate is the electronic energy of the molecules.

In our study, we employed the computational hydrogen electrode (CHE) model to calculate the Gibbs free energy change (Δ*G*) of the proton-coupled electron transfer (PCET) step. The CHE model uses one-half of the chemical potential of hydrogen as the chemical potential of the proton-electron pair. The ΔG value was determined using the following equation:

Δ*G*= Δ*E* + ΔZPE – *T*Δ*S* (4)

In this equation, Δ*E* represents the electronic energy difference between the initial and final states of the PCET step. ΔZPE is the zero-point energy difference between the initial and final states. *T*Δ*S* represents the entropy difference between the initial and final states, where *T* is the absolute temperature.


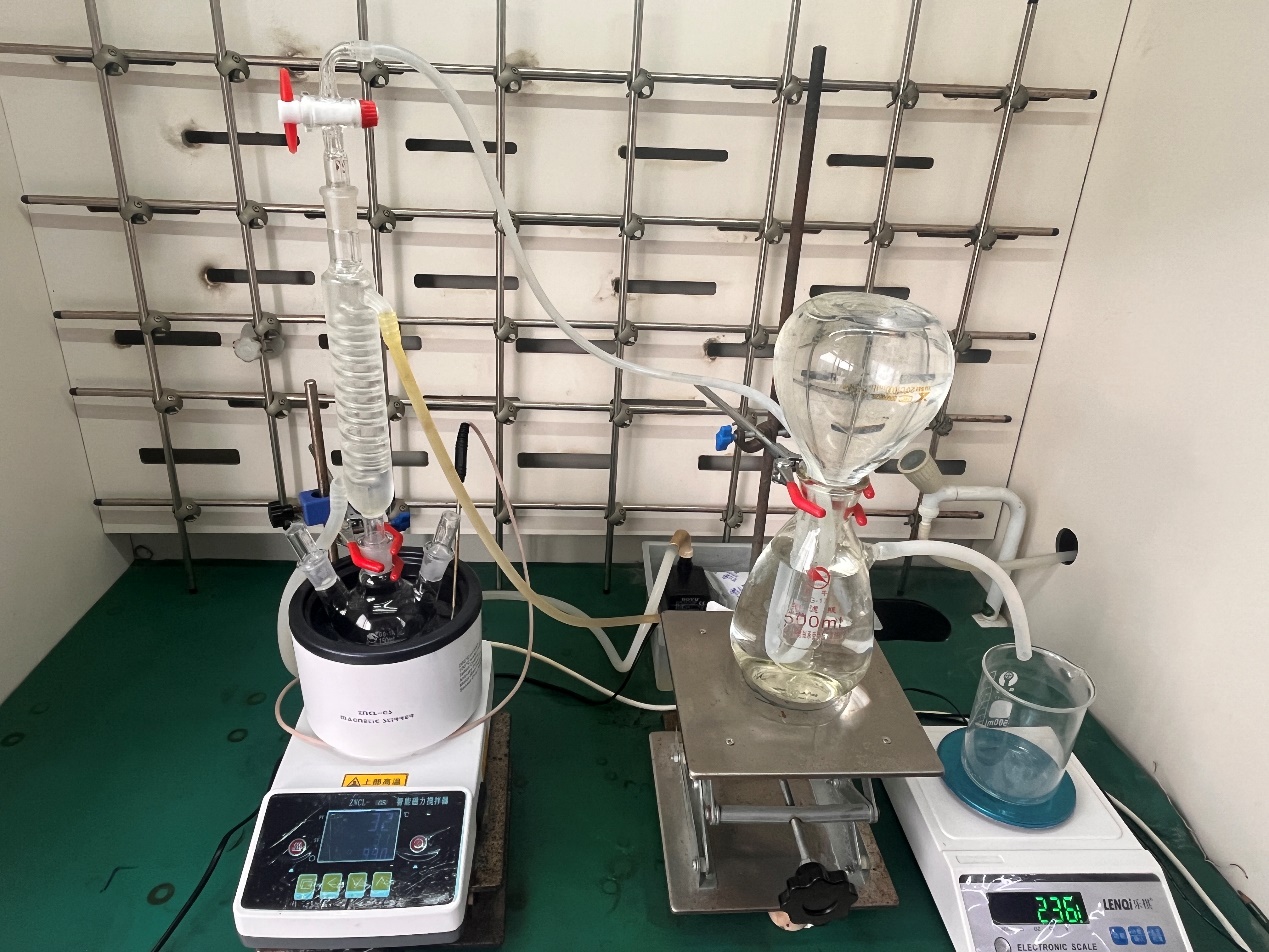


**Fig. S1** Experimental set-up for H2 production from NHP and water

**Fig. S2** XRD patterns of 10%CuPd/TiO2, 10%Pd/TiO2, 10%Cu/TiO2

**Fig. S****3** XPS spectra of CuPd/TiO2, Pd/TiO2, Cu/TiO2 and TiO2

For pure TiO₂, the BE of Ti 2p3/2 and 2p3/2 is 459.00 and 464.77 eV, respectively, matching the standard value for Ti4⁺ in TiO2. The BE of Ti 2p in the Pd/TiO₂ shifts low direction to 458.76 and 464.50 eV (Fig. S3a), suggesting a ‌slight electron transfer‌ from Pd to Ti4⁺, likely due to the interaction between Pd and TiO2 surface oxygen. The BE of Ti 2p in the CuPd/TiO₂ further shifts lower direction to 458.61 and 464.32 eV, ascribing to the stronger interaction between Cu and TiO₂ (Fig. S3a), which induces the formation of Cuδ+,1,2 and the Cuδ+ could withdraw electrons from Pd. A similar phenomenon was observed in the O XPS results (Fig. S3b). The electron transfer from Pd and Cu were further supported by the Ti and O XPS analyses.

**Fig. S4** N2 adsorption-desorption isotherm plots of the samples


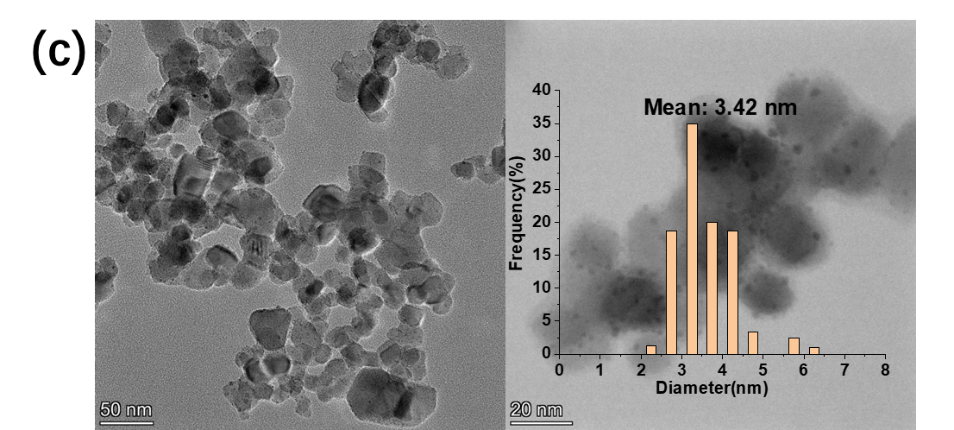


**Fig. S5** (a) Pd 3d, (b) Cu 2p XPS spectra of CuPd/TiO2 catalyst before and after use, and (c) TEM micrographs of CuPd/TiO2 after use.

**Fig. S6** The effects of the second metal on hydrogen production. (a) initial activity and (b) time course of hydrogen production from aqueous NHP solution using MPd/TiO2 with different M metals.

The results (Fig. S6) imply that the choice of the second metal is crucial for optimizing the H2 production activity of the catalyst, MnPd/TiO2, NiPd/TiO2, CoPd/TiO2, and FePd/TiO2 cannot effectively promote the initial activity compared with Pd/TiO2, but MnPd/TiO2, NiPd/TiO2, and CoPd/TiO2 can increase the final conversion of NHP to ~100%. The CuPd/TiO2 obviously has the highest initial activity and the shortest time for reaching equivalent conversion, indicating its outstanding performance in catalyzing HPH reaction.

**Fig. S7** The effects of the supports on hydrogen production. (a) initial activity and (b) time course of hydrogen production over CuPd/Support catalysts supported by different supports.

Among the selected supports, the catalyst loaded with TiO2 (CuPd/TiO2) exhibited the highest activity, which was significantly higher than that of the other supports. The second tier in terms of activity is C (Vulcan XC-72 carbon) or g-C3N4 (graphitic carbon nitride) supported CuPd(CuPd/C and CuPd/ g-C3N4). The activities of the catalysts with common oxide (such as SiO2, γ-Al2O3, and ZnO) as supports are relatively low even inactive. The results indicate the supports also plays important role in H2 production performance of CuPd catalysts. Previous studies have proved that the acidity of the TiO2 may induce partial electron transfer from metal nanoparticle to TiO2,3 this is supported by the Ti and O XPS analyses. Furthermore, the hydrogen spillover is enhanced due to the surface acidity of TiO2, thus the superior H2 production activity of CuPd/TiO2 achieves.4

**Fig. S8** The plots of lnr against 1/T over Pd/TiO2 catalyst

**Fig. S9** The effects of pH on hydrogen production

**Fig. S10** (a) FT-IR spectra and (b) 31P-NMR spectra (D2O solvent) of solid product from HPH reaction and pure NaH2PO3

As shown in Fig. S10a, the broad band ranging from 3300 to 3600 cm−1 with the center at 3442 cm−1 is assigned to the O–H stretching vibration 5. The band at 2402 cm−1 is because of P-H stretching vibration 6. The band at 1655 cm−1 is ascribed to P-O-H bending vibration, while the bands at 1173, 1072, 1004, and 904 cm−1 are attributed to P-O stretching vibration 7. The band at 554 cm−1 is attributed to the existence of Na-O bond 8. The FT-IR spectrum of solid product is highly consistent with that of pure NaH2PO3. As shown in Fig. S10b, the peak of 2.59 ppm is due to the P3+ in H2PO3− 9,10. The 31P-NMR spectrum of solid product is highly consistent with that of pure NaH2PO3.


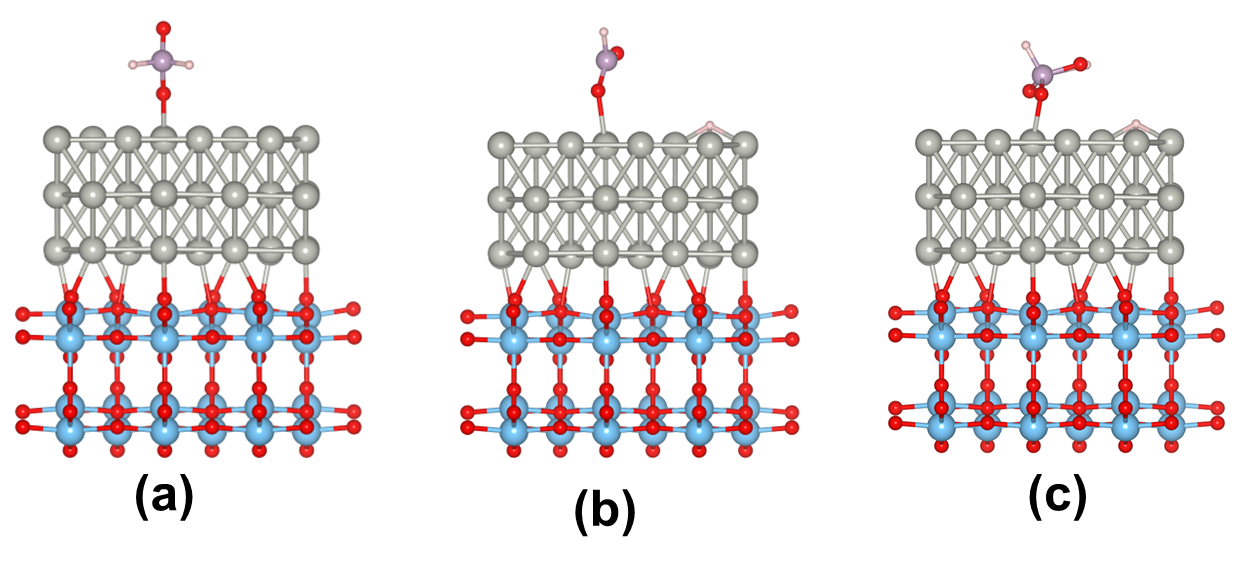


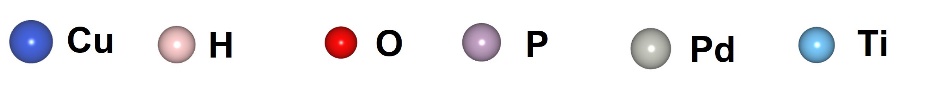


**Fig. S11** Adsorption structures of (a) H2PO2−, (b) HPO2− and H, and (c) H2PO3− and H on Pd (111) sites in Pd/TiO2


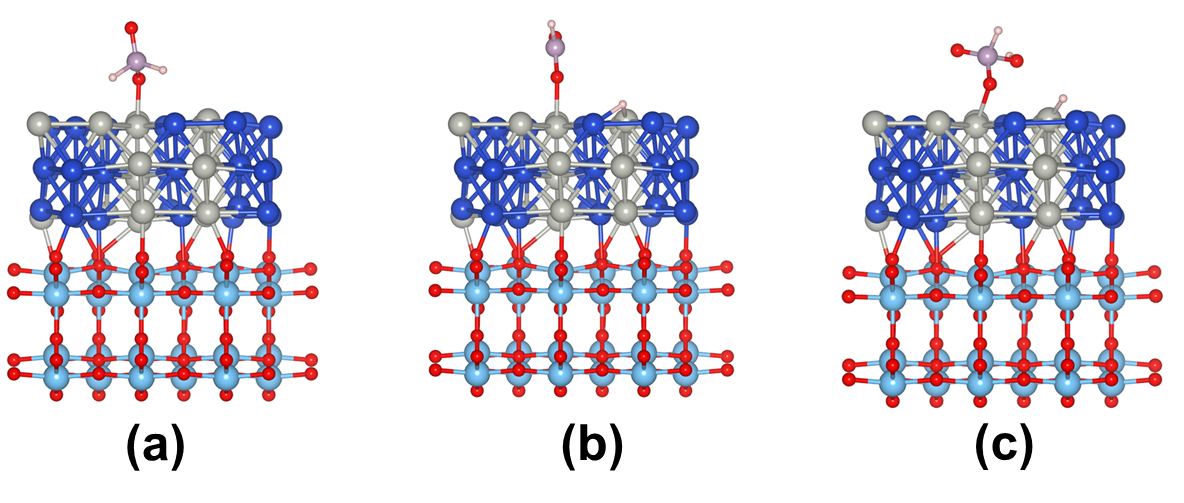


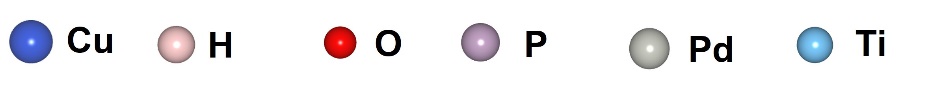


**Fig. S12** Adsorption structures of (a) H2PO2−, (b) HPO2− and H, and (c) H2PO3− and H on Pd (111) sites in CuPd/TiO2

**References**

1. Ardila, A. N., Sánchez-Castillo, M. A., Zepeda, T. A., Villa, A. L. & Fuentes, G. A. Glycerol hydrodeoxygenation to 1,2-propanediol catalyzed by CuPd/TiO2-Na. *Appl. Catal. B Environ.* **219**, 658–671 (2017).

2. Yamauchi, M., Abe, R., Tsukuda, T., Kato, K. & Takata, M. Highly Selective Ammonia Synthesis from Nitrate with Photocatalytically Generated Hydrogen on CuPd/TiO2. *J. Am. Chem. Soc.* **133**, 1150–1152 (2011).

3. Liu, Y. *et al.* Highly efficient PdAg catalyst using a reducible Mg-Ti mixed oxide for selective hydrogenation of acetylene: Role of acidic and basic sites. *J. Catal.* **348**, 135–145 (2017).

4. Ball, M. R. *et al.* AgPd and CuPd Catalysts for Selective Hydrogenation of Acetylene. *ACS Catal.* **10**, 8567–8581 (2020).

5. Xu, H. *et al.* An Fe-doped Co11(HPO3)8(OH)6 nanosheets array for high-performance water electrolysis. *Electrochim. Acta* **334**, 135616 (2020).

6. Xu, Z. *et al.* A new crystal Mg11(HPO3)8(OH)6 for daytime radiative cooling. *Sol. Energy Mater. Sol. Cells* **185**, 536–541 (2018).

7. Menezes, P. W. *et al.* A structurally versatile nickel phosphite acting as a robust bifunctional electrocatalyst for overall water splitting. *Energy Environ. Sci.* **11**, 1287–1298 (2018).

8. Tian, S. & Zhang, Z. Photo-electrochemical oxidation of hypophosphite and phosphorous recovery by UV/Fe2+/peroxydisulfate with electrochemical process. *Chem. Eng. J.* **359**, 1075–1085 (2019).

9. Yoza, N., Ueda, N. & Nakashima, S. pH-dependence of 31P-NMR spectroscopic parameters of monofluorophosphate, phosphate, hypophosphate, phosphonate, phosphinate and their dimers and trimers. *Fresenius J. Anal. Chem.* **348**, 633–638 (1994).

10. Liu, D. *et al.* Disproportionation of hypophosphite and phosphite. *Dalton Trans.* **46**, 6366–6378 (2017).
